# Supplementary material
Source: PubMed Central journal article supplement (PMC5124089)
Supplement: rspb20161303supp1.pdf [file rspb20161303supp1.pdf]

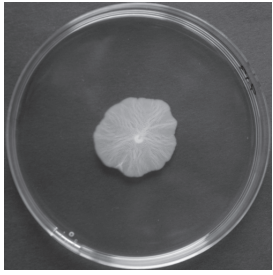

CLIB192

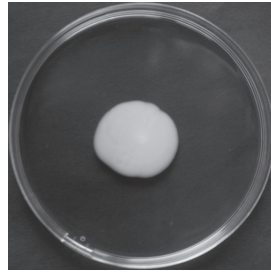

YJM421

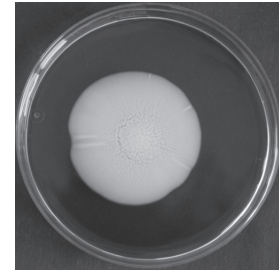

YJM678

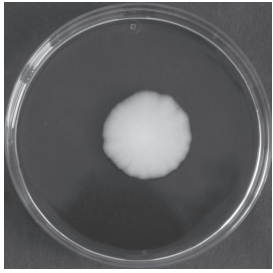

YJM145

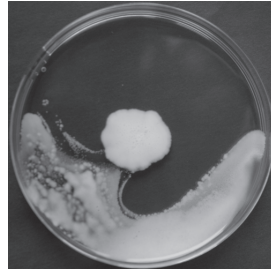

YJM428

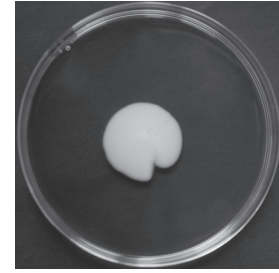

CBS7960

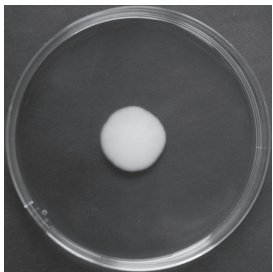

YJM280

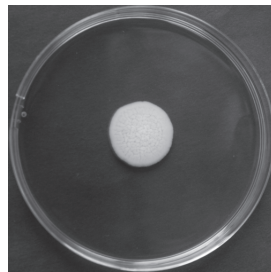

YJM434

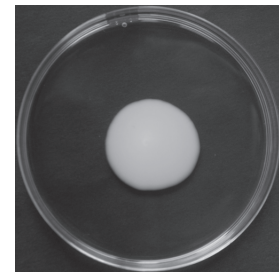

CECT10109

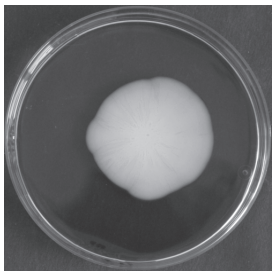

YJM320

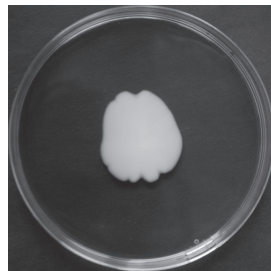

YJM436

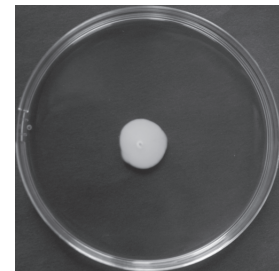

DBVPG1788

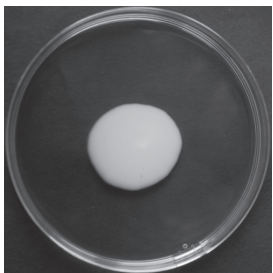

YJM326

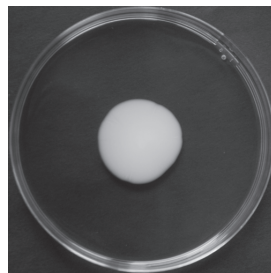

YJM454

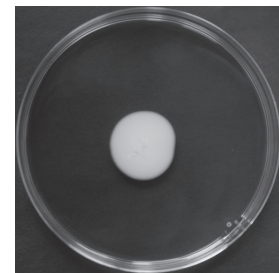

DBVPG1794

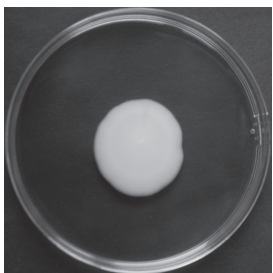

YJM413

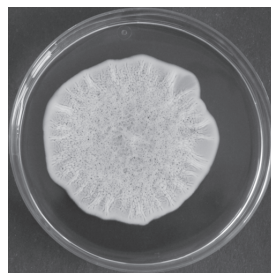

YJM653

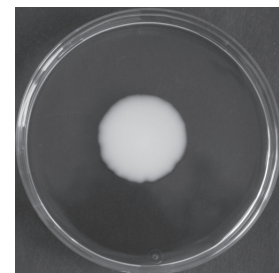

DBVPG3591

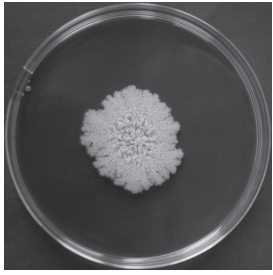

DBVPG4651

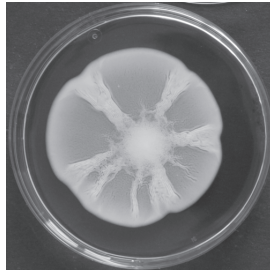

Y10

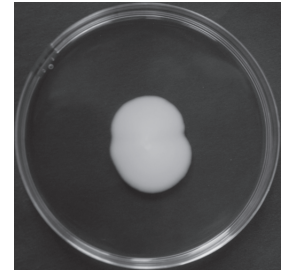

114

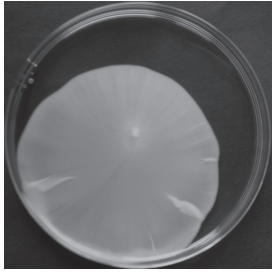

DBVPG6861

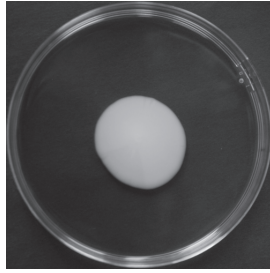

Y12

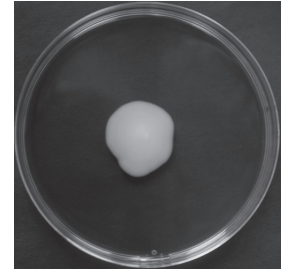

M22

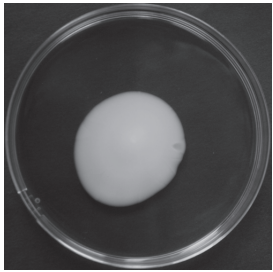

YPS1000

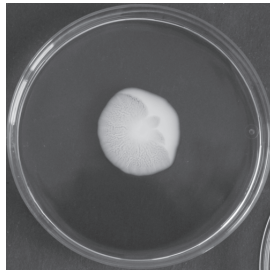

Y3

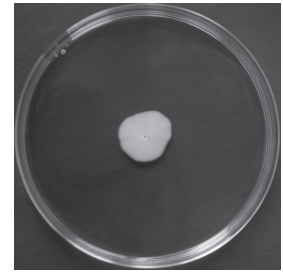

T73

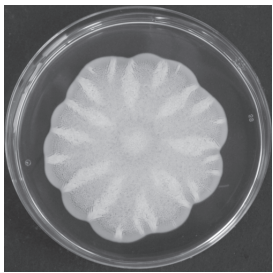

YPS163

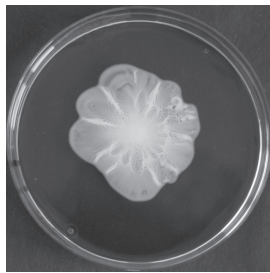

Y9

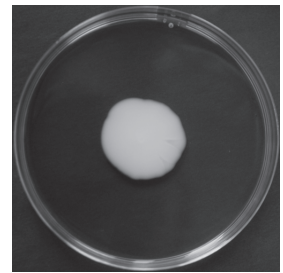

UC8

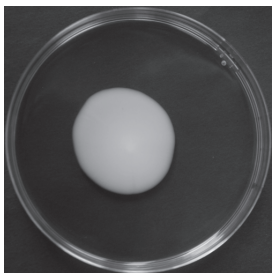

CLIB413

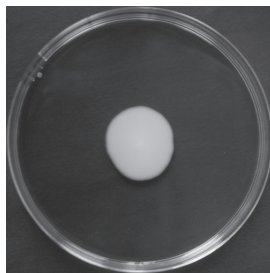

YJM269

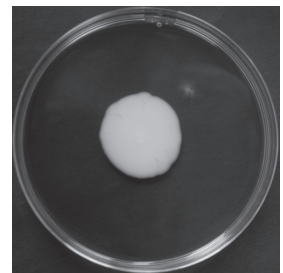

WE372

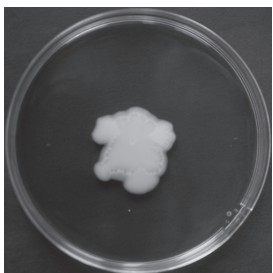

K12

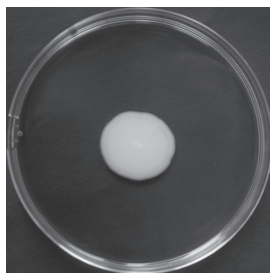

CLIB219

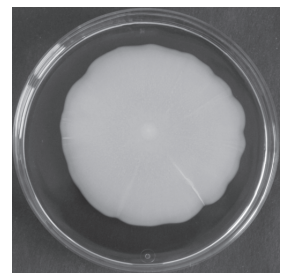

Y55

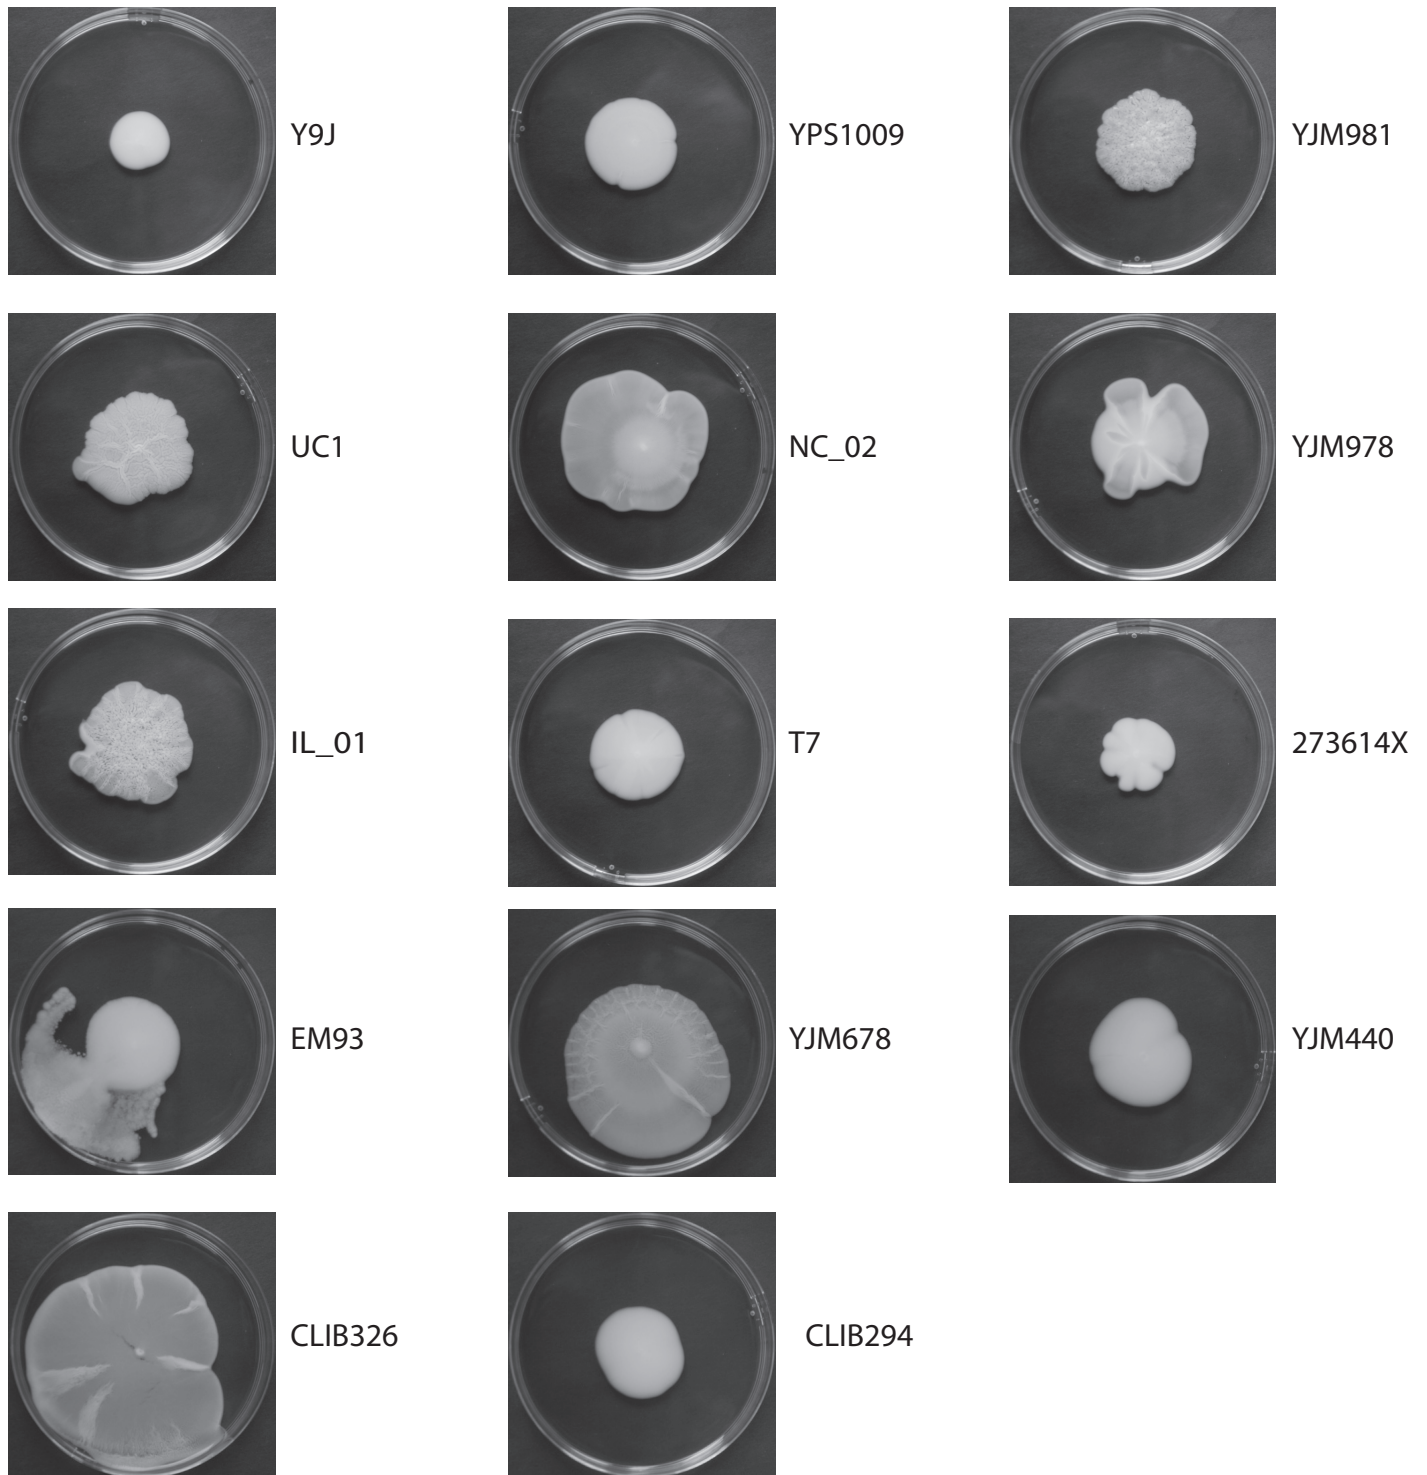

**Figure S1. Morphology of natural *S. cerevisiae* isolates.** Inoculations were always 500 cells in the center of semisolid complex medium plates (9 cm Ø, 0.3% agar, YPD), which were grown for seven days at room temperature. Large structured colonies (YJM653; DBVPG6861; YPS163; Y55, CLIB326; YJM678) were biofilm formers, whereas all others were wrinkled small colonies (DBVPG46651, YJM981) and smooth small colonies that did not form biofilms. NC-02, Y9, Y10 formed smaller slightly structured colonies and were recorded as smooth.
