# Supplementary material
Source: PubMed Central journal article supplement (PMC5124089)
Supplement: rspb20161303supp2.pdf [file rspb20161303supp2.pdf]

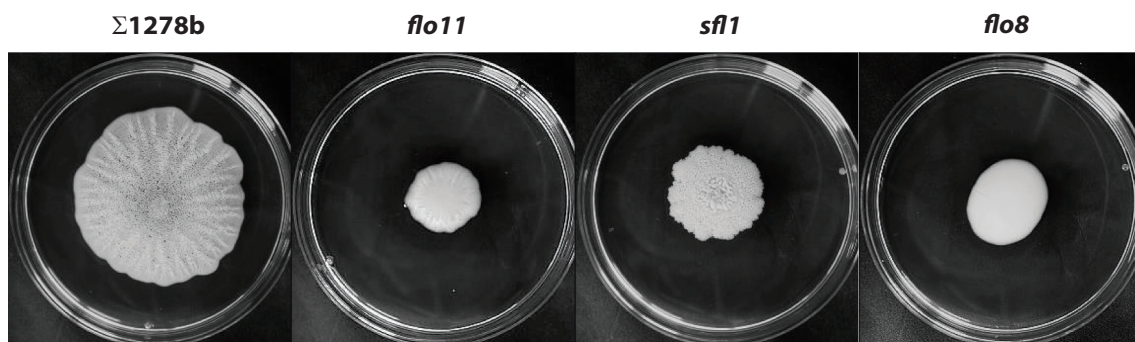

**Figure S2. Morphology of a *flo11* (Flo11<sup>-</sup>) mutant compared to wild type Σ1278b, *sfl1* (Flo11<sup>+</sup>) and *flo8* (Flo11<sup>-</sup>).** Inoculations were made with 500 cells in the center of semisolid complex medium plates (9 cm Ø, 0.3% agar, YPD), which were grown for seven days at room temperature. Morphology and size of *flo11* and *flo8* colonies were similar.
