# Supplementary material
Source: PubMed Central journal article supplement (PMC5124089)
Supplement: rspb20161303supp3.pdf [file rspb20161303supp3.pdf]

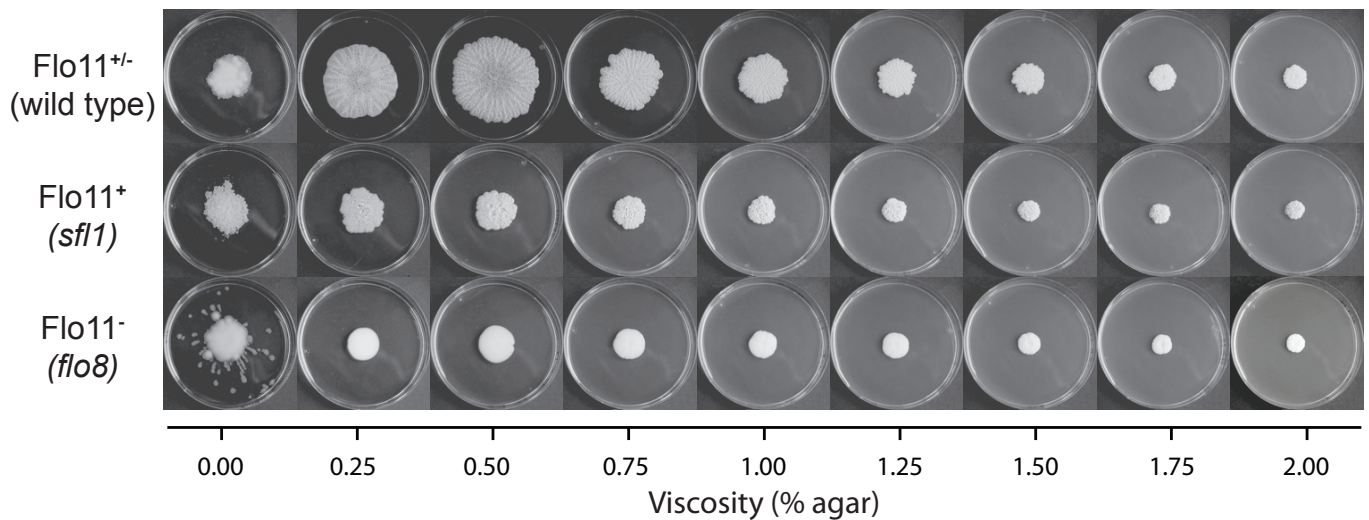

**Figure S3. Images that produced the measurements on medium viscosity and colony growth rates shown in Figure 3A.** The experiment was based on three independent measurements involving a total number of 54 plates. Inoculations were made with 500 cells in the center of complex medium plates (9 cm Ø, YPD) with varying viscosity (% agar), which were grown for seven days at room temperature. The images shown are a representative selection.
