# Supplementary material
Source: PubMed Central journal article supplement (PMC5124089)
Supplement: rspb20161303supp4.pdf [file rspb20161303supp4.pdf]

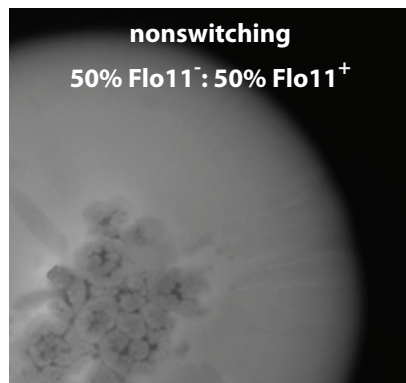

**Figure S4. A representative example of a colony initiated by a mixed inoculation of *sf11* (Flo11<sup>+</sup>) and *flo8* (Flo11<sup>-</sup>) cells from different clones.** Inoculations of this type were always 250 Flo11<sup>-</sup> and 250 Flo11<sup>+</sup> cells (fourth column in Figure 3B) in the center of semisolid complex medium plates (9 cm Ø, 0.3% agar, YPD), which were grown for seven days at room temperature.
